# Supplementary material for: Penifuranone A: A Novel Alkaloid from the Mangrove Endophytic Fungus Penicillium crustosum SCNU-F0006
Source: MDPI journal article supplement (doi:10.3390/ijms25095032), 2024-05-05
Supplement: s1 [file s1]

*Supplementary Material*

# **Penifuranone A: A Novel Alkaloid from the Mangrove Endophytic Fungus *Penicillium crustosum* SCNU-F0006**

**Hao Jia, Li Wu, Rongrong Liu, Jialin Li, Lingling Liu, Chen Chen, Junsen Li, Kai Zhang, Junjiang Liao and Yuhua Long \***

Guangzhou Key Laboratory of Analytical Chemistry for Biomedicine, School of Chemistry, South China Normal University, Guangzhou 510006, China;  
haojia@m.scnu.edu.cn (H.J.); wuli@m.scnu.edu.cn (L.W.);  
rongrongliu@m.scnu.edu.cn (R.L.); jialinli@m.scnu.edu.cn (J.L.);  
linglingliu600@m.scnu.edu.cn (L.L.); chenchen2021@m.scnu.edu.cn (C.C.);  
junsenli@m.scnu.edu.cn (J.L.); zhangkai2021@m.scnu.edu.cn (K.Z.);  
junjiangliao0712@m.scnu.edu.cn (J.L.)

\* Correspondence: longyh@scnu.edu.cn

## Table of content

|                                                                                                                       |    |
|-----------------------------------------------------------------------------------------------------------------------|----|
| Figure S1. Compounds <b>1-4</b> and <b>1a</b> were analyzed by TLC at a wavelength of 254 nm. ....                    | 3  |
| Figure S2. Compounds <b>1-4</b> and <b>1a</b> are tested with Wagner's reagent( $I_2 \cdot KI$ ) for coloration. .... | 3  |
| Figure S3. Parameter of TLC. ....                                                                                     | 4  |
| Figure S4. HPLC analysis of compound <b>1</b> . ....                                                                  | 5  |
| Figure S5. UV spectrum of compound <b>1</b> (MeOH). ....                                                              | 6  |
| Figure S6. IR spectrum of compound <b>1</b> (KBr). ....                                                               | 6  |
| Figure S7. HRESIMS spectrum of compound <b>1</b> . ....                                                               | 7  |
| Figure S8. $^1H$ NMR (DMSO- $d_6$ , 600 MHz) spectrum of compound <b>1</b> . ....                                     | 7  |
| Figure S9. $^{13}C$ NMR (DMSO- $d_6$ , 150 MHz) spectrum of compound <b>1</b> . ....                                  | 8  |
| Figure S10. $^1H$ , $^1H$ - COSY (DMSO- $d_6$ , 600 MHz) spectrum of compound <b>1</b> . ....                         | 8  |
| Figure S11. HSQC (DMSO- $d_6$ , 600 MHz) spectrum of compound <b>1</b> . ....                                         | 9  |
| Figure S12. HMBC (DMSO- $d_6$ , 600 MHz) spectrum of compound <b>1</b> . ....                                         | 9  |
| Figure S13. NOESY (DMSO- $d_6$ , 600 MHz) spectrum of compound <b>1</b> . ....                                        | 10 |
| Figure S14. UV spectrum of compound <b>1a</b> (MeOH). ....                                                            | 10 |
| Figure S15. IR spectrum of compound <b>1a</b> (KBr). ....                                                             | 11 |
| Figure S16. HRESIMS spectrum of compound <b>1a</b> . ....                                                             | 12 |
| Figure S17. $^1H$ NMR ( $CDCl_3$ , 600 MHz) spectrum of compound <b>1a</b> . ....                                     | 12 |
| Figure S18. $^{13}C$ NMR ( $CDCl_3$ , 150 MHz) spectrum of compound <b>1a</b> . ....                                  | 13 |

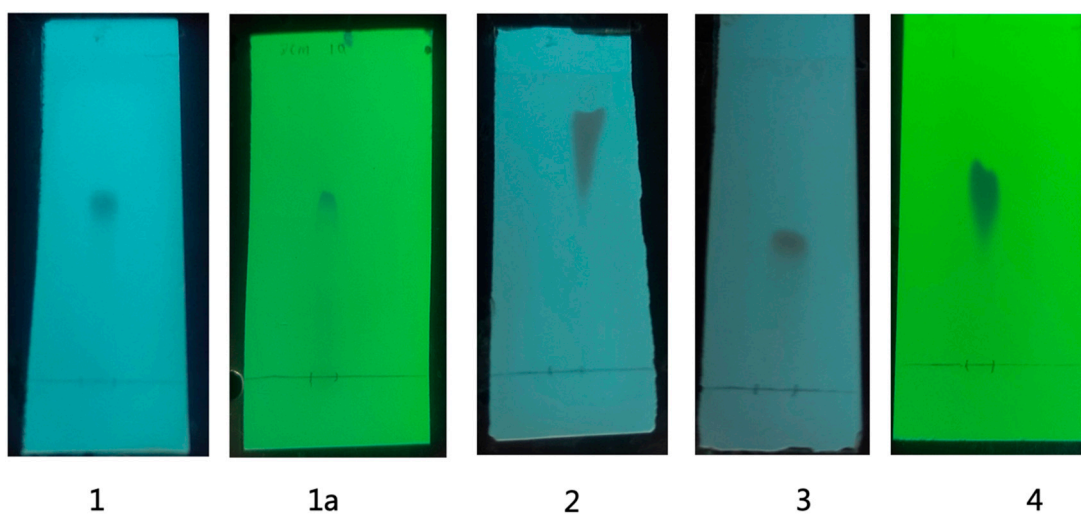

**Figure S1.** Compounds **1-4** and **1a** were analyzed by TLC at a wavelength of 254 nm.

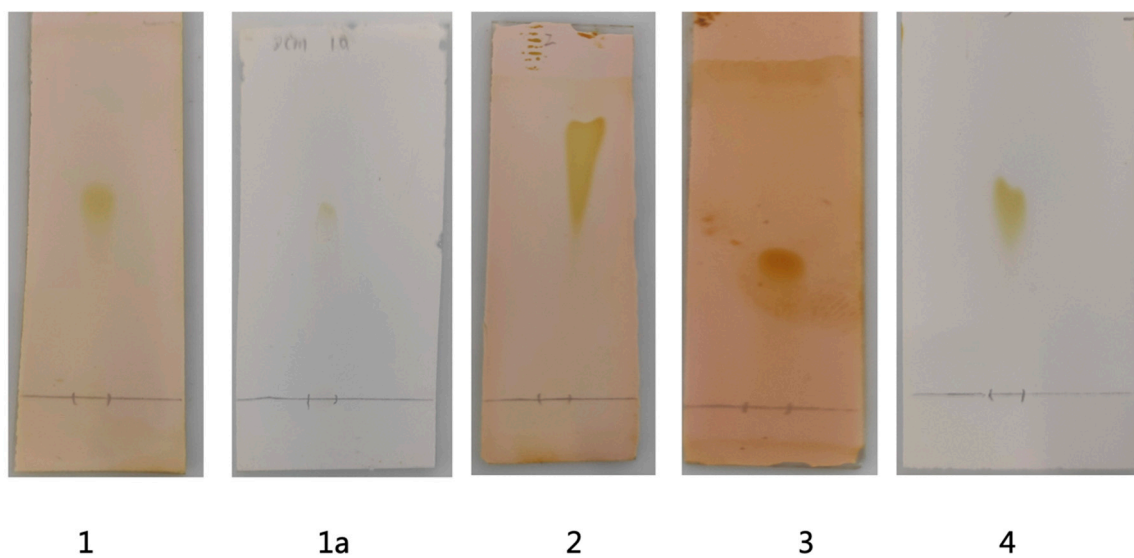

**Figure S2.** Compounds **1-4** and **1a** are tested with Wagner's reagent( $I_2 \cdot KI$ ) for coloration.

| Compounds | Stationary Phase                              | Mobile Phase                    | Rf Value |
|-----------|-----------------------------------------------|---------------------------------|----------|
| 1         | TLC Silica gel 60 RP-18<br>F <sub>254</sub> S | MeOH:H <sub>2</sub> O=<br>60:40 | 0.55     |
| 1a        | TLC silica gel GF254<br>plates                | Dichlorometh<br>ane(DCM)        | 0.58     |
| 2         | TLC Silica gel 60 RP-18<br>F <sub>254</sub> S | MeOH:H <sub>2</sub> O=<br>70:30 | 0.77     |
| 3         | TLC Silica gel 60 RP-18<br>F <sub>254</sub> S | MeOH:H <sub>2</sub> O=<br>70:30 | 0.56     |
| 4         | TLC silica gel GF254<br>plates                | DCM:MeOH<br>=60:6               | 0.52     |

**Figure S3.** Parameter of TLC.

## &lt; Sample Information &gt;

Sample : Compound 1  
Mobile phase : Methanol : Water = 60: 40  
Injection volume : 20 uL  
Date : 2024/4/20  
Analyst: Hao Jia

## &lt; Chromatogram &gt;

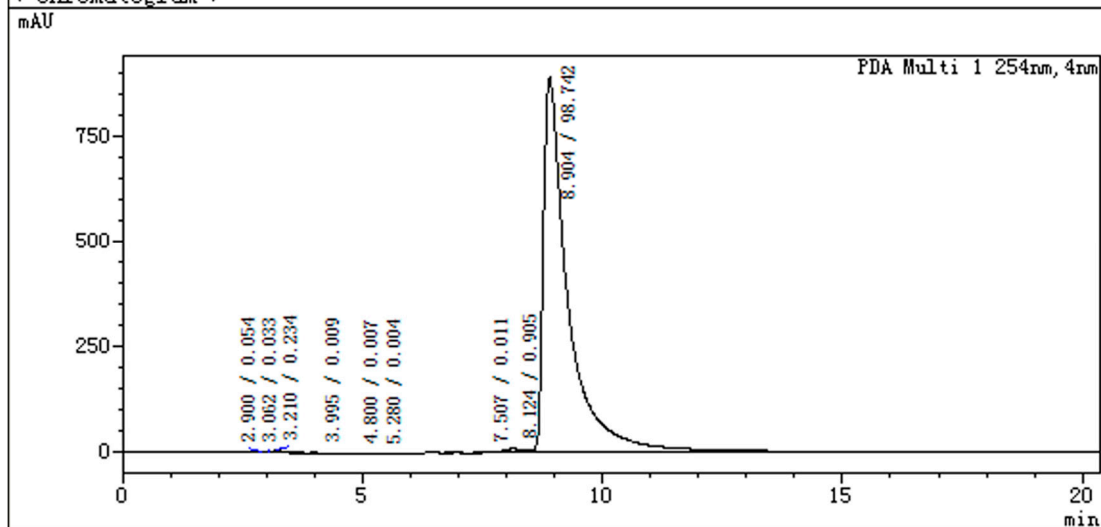

## &lt; Peak Table &gt;

| PDA Ch1 254nm |                |          |                 |        |                   |
|---------------|----------------|----------|-----------------|--------|-------------------|
| Peak Number   | Retention Time | Area     | Area Percentage | Height | Height Percentage |
| 1             | 2.900          | 17545    | 0.054           | 2125   | 0.233             |
| 2             | 3.062          | 10920    | 0.033           | 1951   | 0.214             |
| 3             | 3.210          | 76359    | 0.234           | 6425   | 0.704             |
| 4             | 3.995          | 2978     | 0.009           | 397    | 0.044             |
| 5             | 4.800          | 2227     | 0.007           | 188    | 0.021             |
| 6             | 5.280          | 1257     | 0.004           | 128    | 0.014             |
| 7             | 7.507          | 3594     | 0.011           | 308    | 0.034             |
| 8             | 8.124          | 295367   | 0.905           | 9159   | 1.004             |
| 9             | 8.904          | 32210811 | 98.742          | 891844 | 97.734            |
| 总计            |                | 32621058 | 100.000         | 912526 | 100.000           |

Figure S4. HPLC analysis of compound 1.

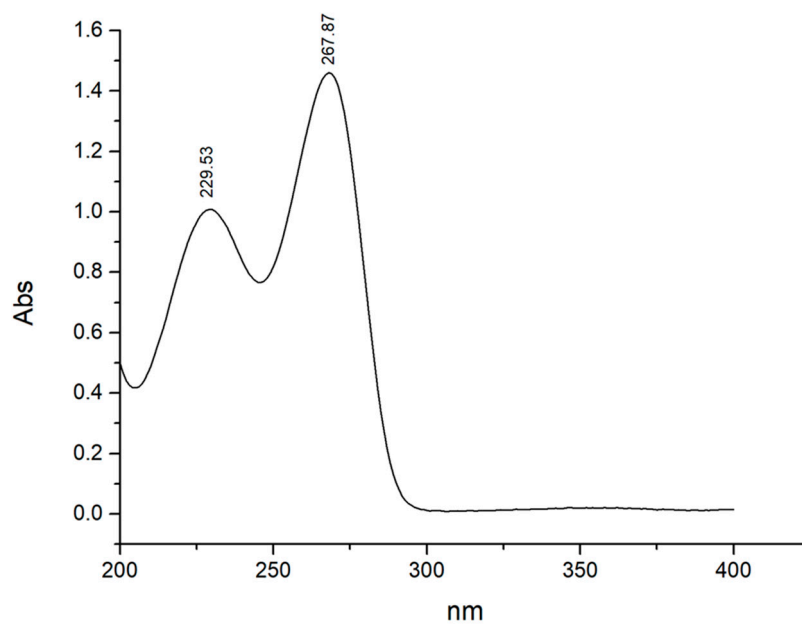

**Figure S5.** UV spectrum of compound **1** (MeOH).

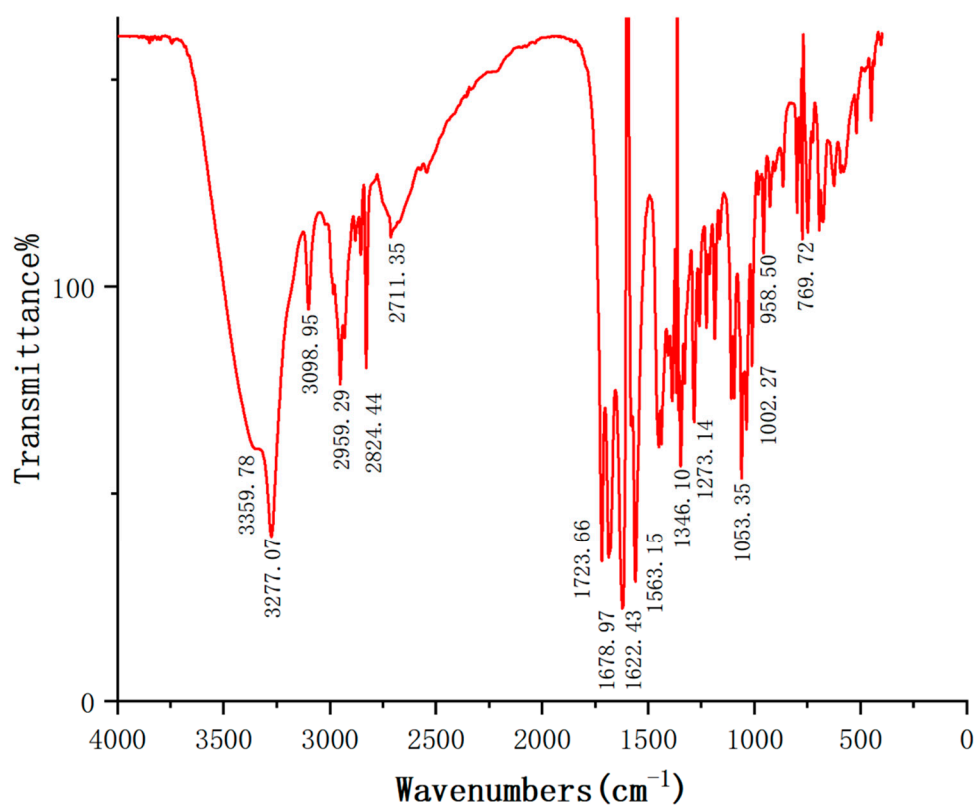

**Figure S6.** IR spectrum of compound **1** (KBr).

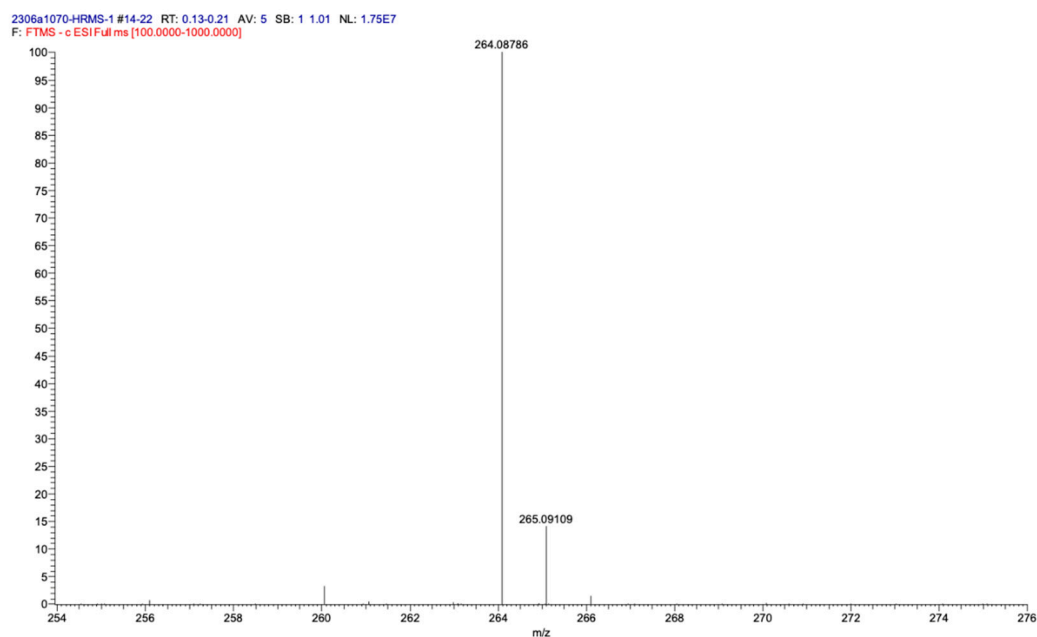

SPECTRUM - simulation :

| m/z       | Theo. Mass | Delta (ppm) | RDB equiv. | Composition  |
|-----------|------------|-------------|------------|--------------|
| 264.08786 | 264.08775  | 0.43        | 7.5        | C13 H14 O5 N |

**Figure S7.** HRESIMS spectrum of compound **1**.

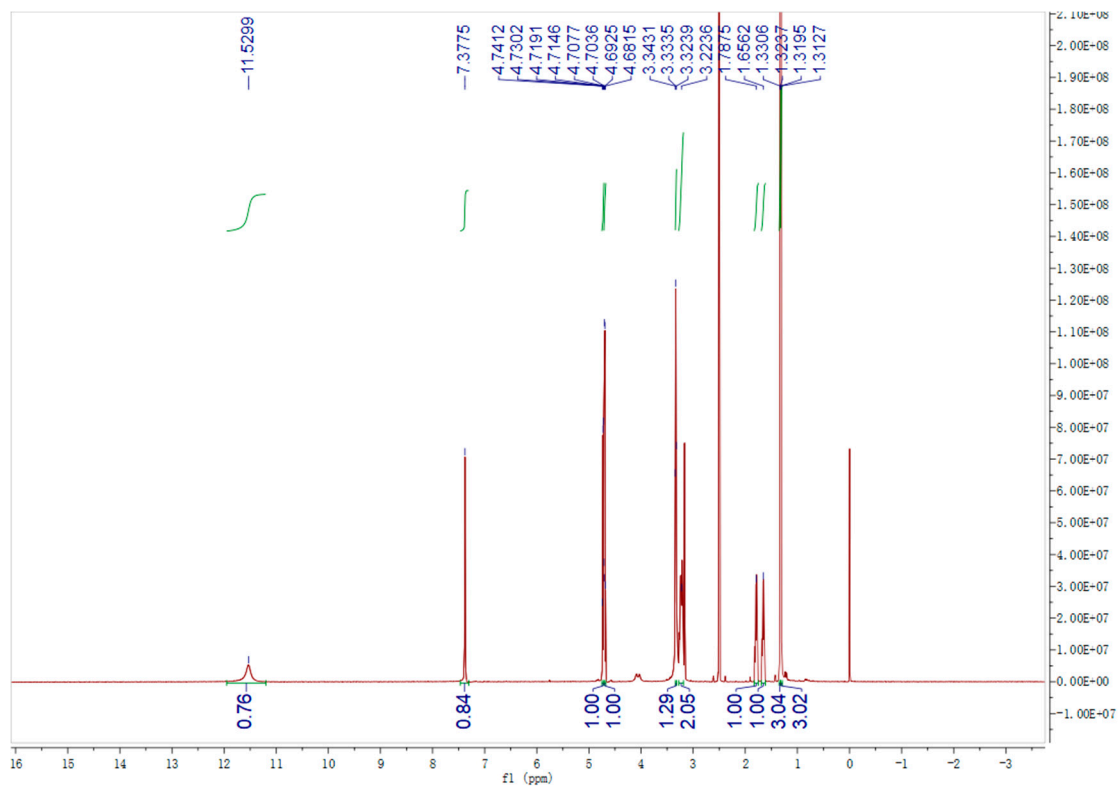

**Figure S8.**  $^1\text{H}$  NMR (DMSO- $d_6$ , 600 MHz) spectrum of compound **1**.

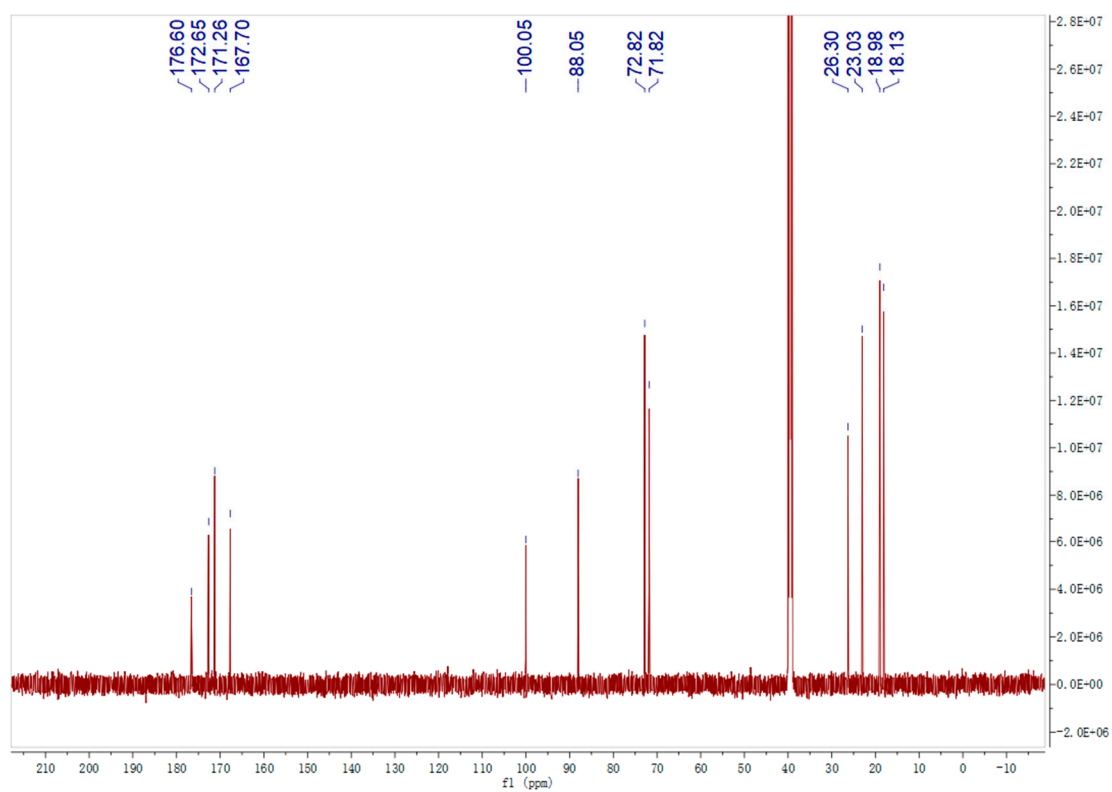

**Figure S9.**  $^{13}\text{C}$  NMR (DMSO- $d_6$ , 150 MHz) spectrum of compound **1**.

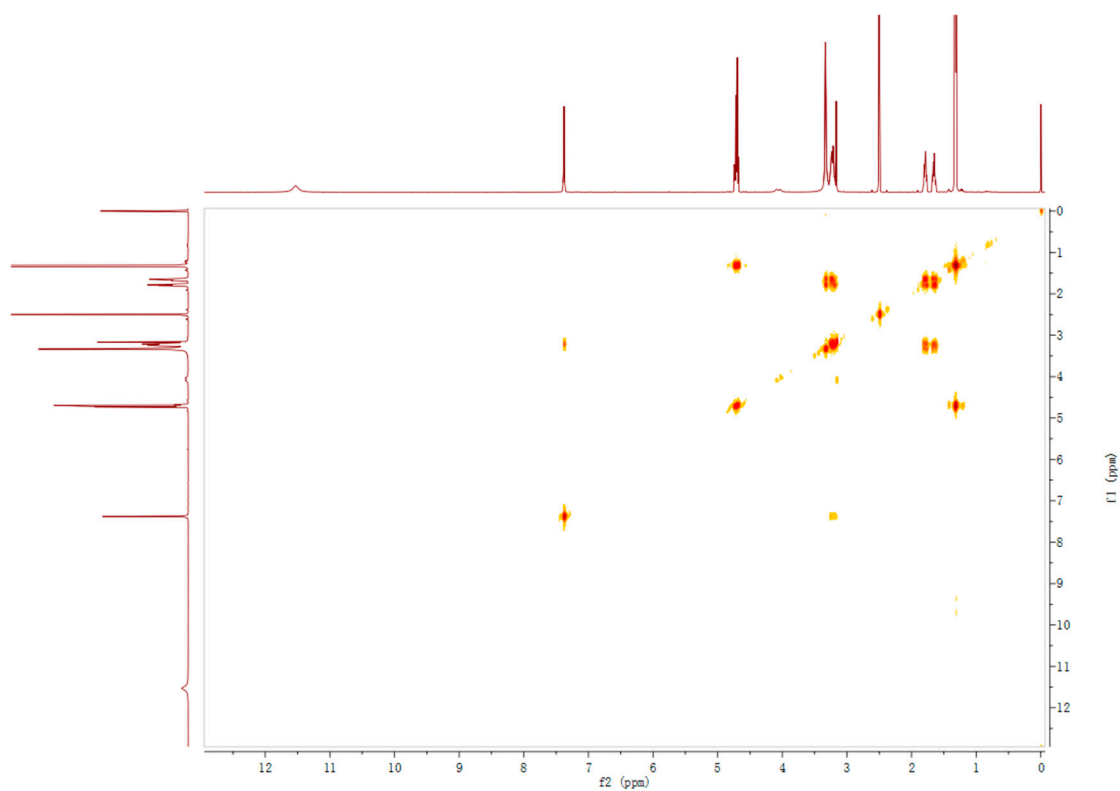

**Figure S10.**  $^1\text{H}$ ,  $^1\text{H}$ - COSY (DMSO- $d_6$ , 600 MHz) spectrum of compound **1**.

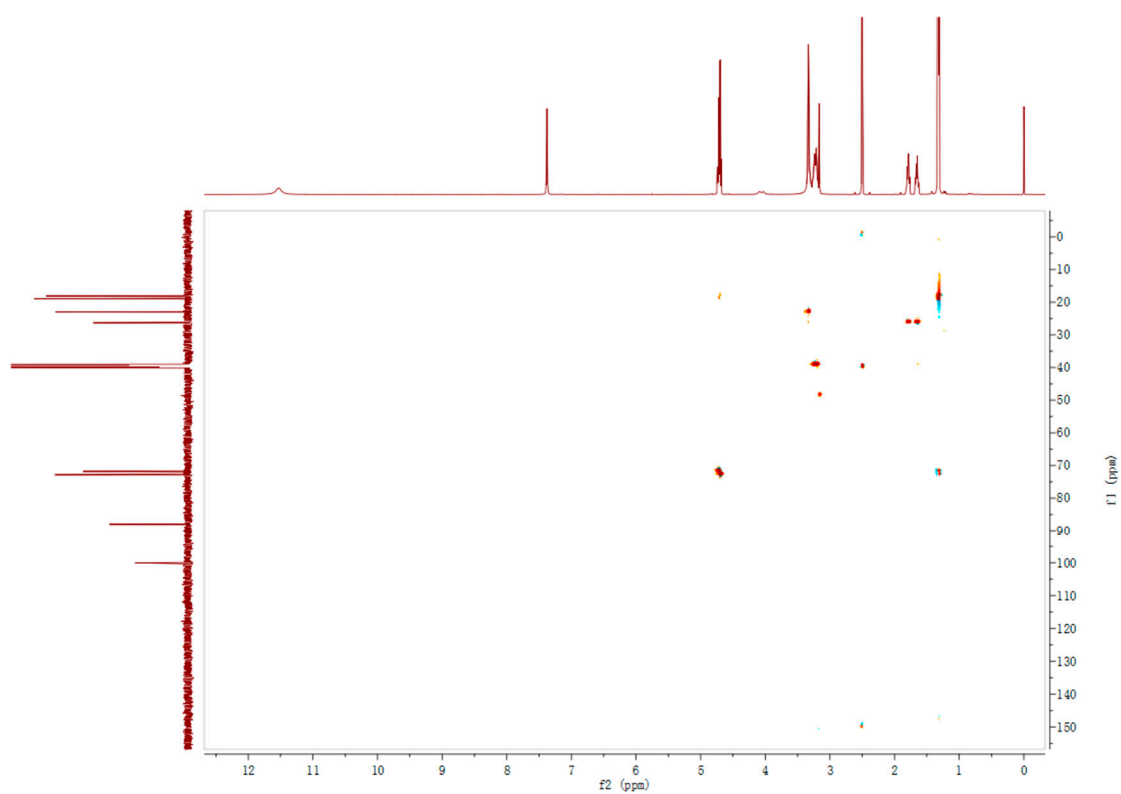

**Figure S11.** HSQC (DMSO- $d_6$ , 600 MHz) spectrum of compound **1**.

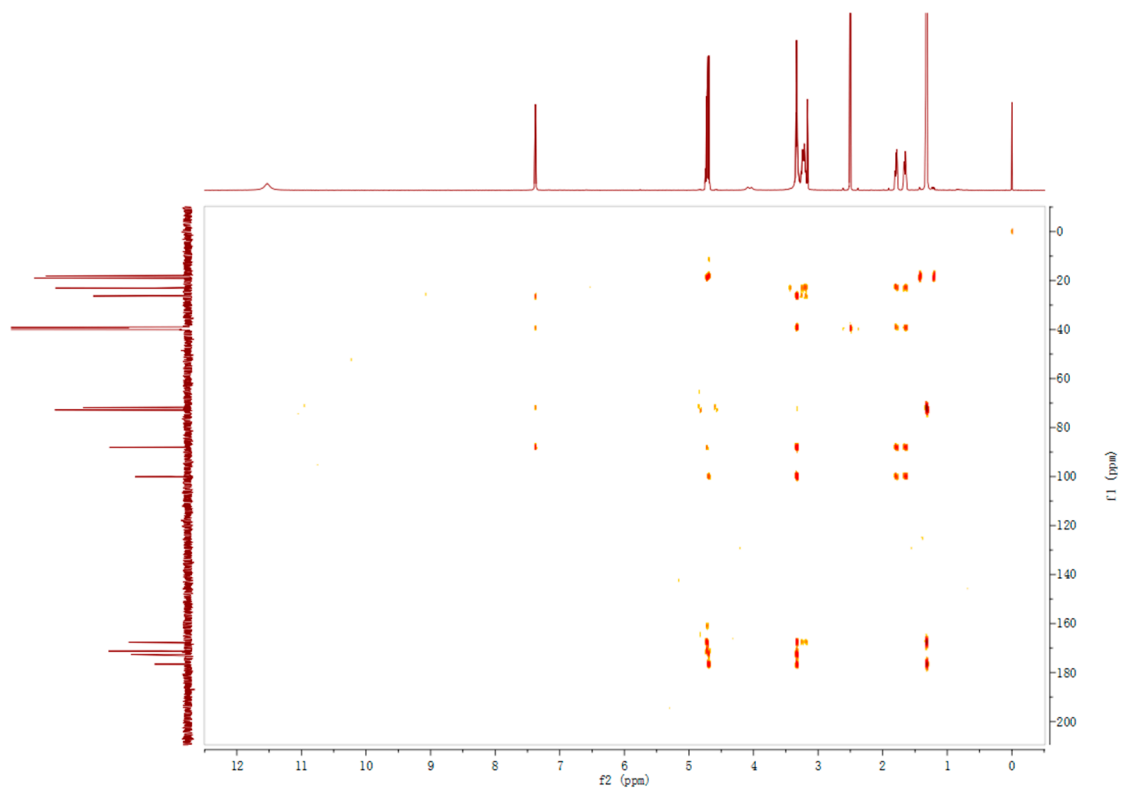

**Figure S12.** HMBC (DMSO- $d_6$ , 600 MHz) spectrum of compound **1**.

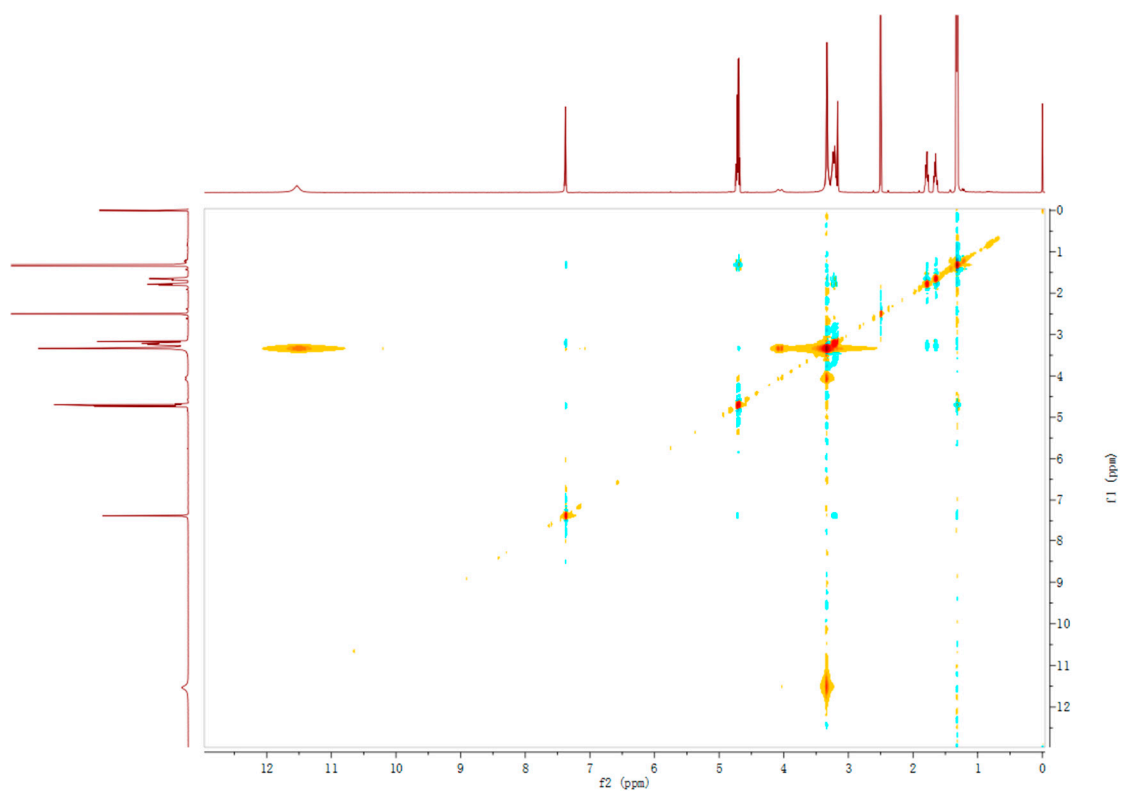

**Figure S13.** NOESY (DMSO-*d*<sub>6</sub>, 600 MHz) spectrum of compound **1**

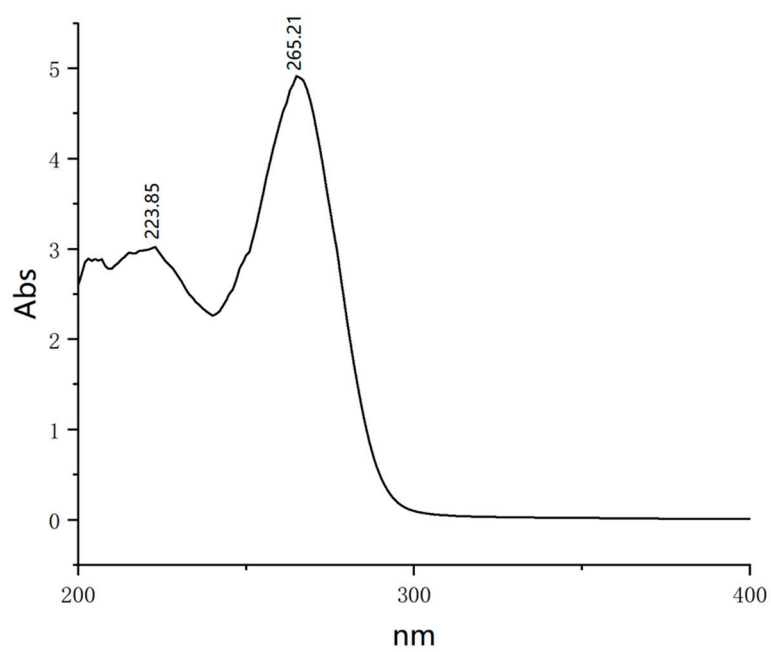

**Figure S14.** UV spectrum of compound **1a** (MeOH).

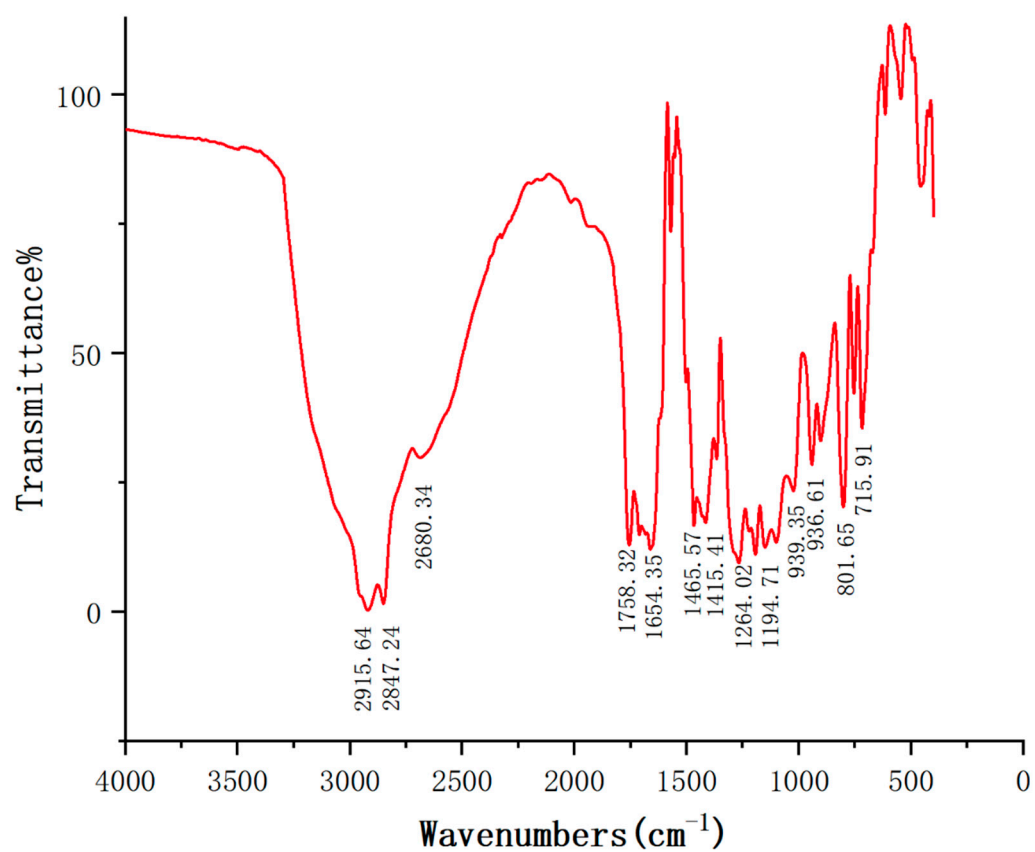

**Figure S15.** IR spectrum of compound **1a** (KBr).

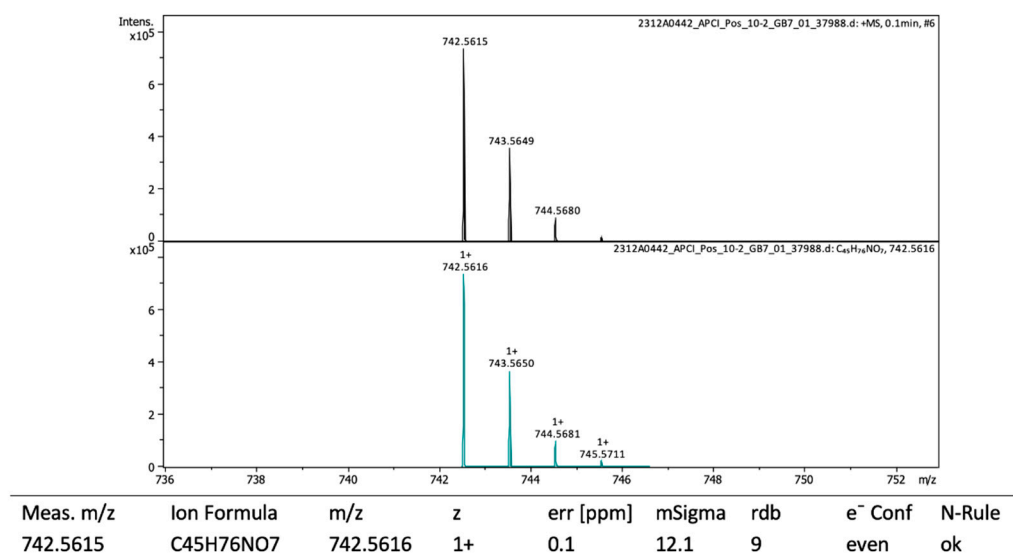

**Figure S16.** HRESIMS spectrum of compound **1a**.

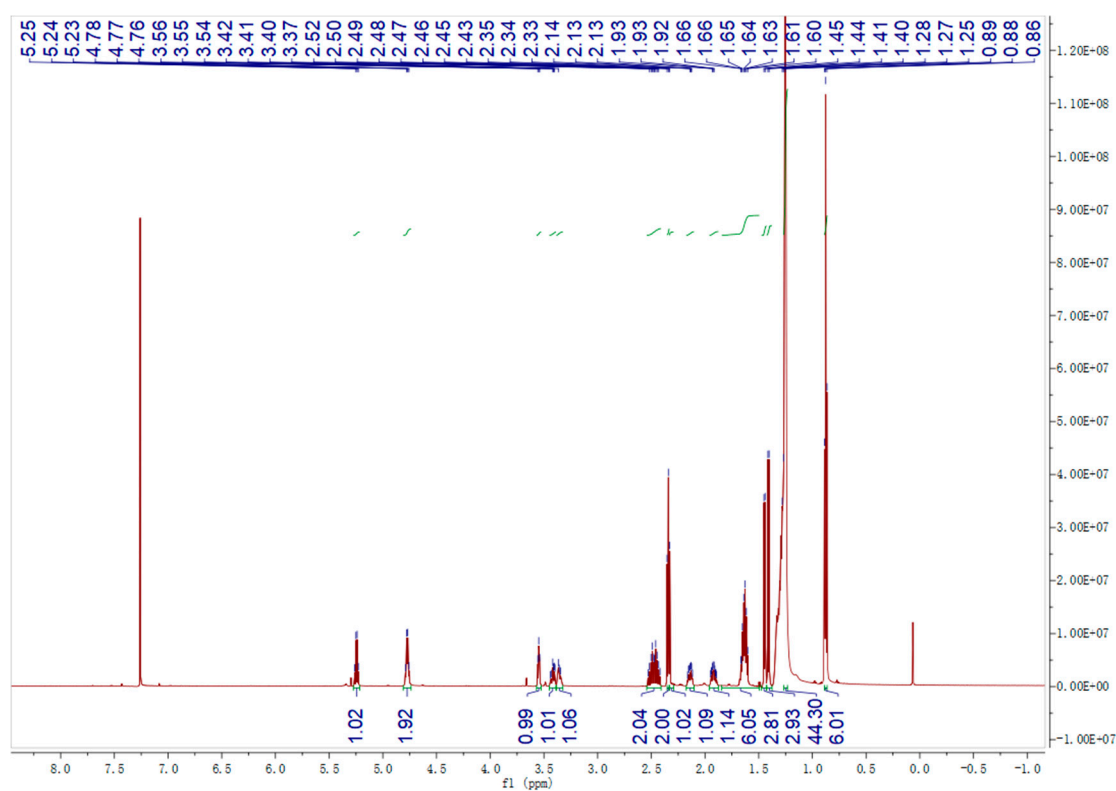

**Figure S17.** <sup>1</sup>H NMR (CDCl<sub>3</sub>, 600 MHz) spectrum of compound **1a**.

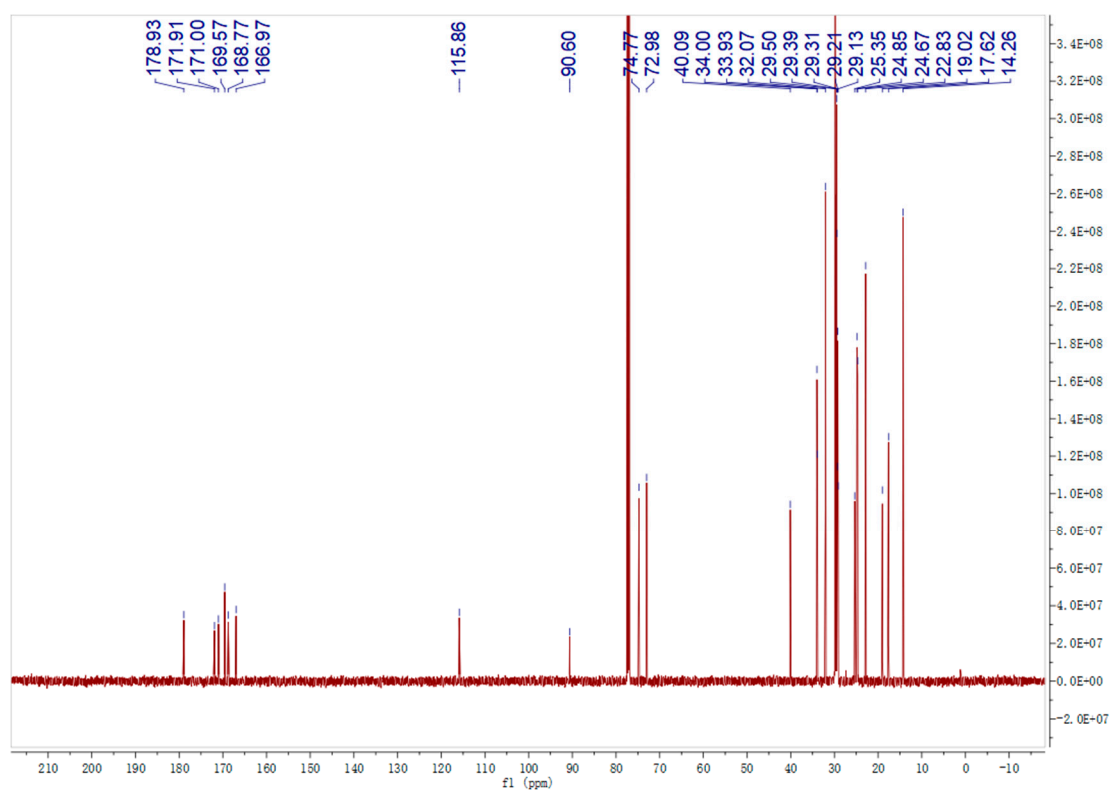

**Figure S18.** <sup>13</sup>C NMR (CDCl<sub>3</sub>, 150 MHz) spectrum of compound **1a**.
